# Supplementary material for: Presence of Porphyromonas gingivalis in esophagus and its association with the clinicopathological characteristics and survival in patients with esophageal cancer
Source: PubMed Central journal article supplement (PMC4717526; doi:10.1186/s13027-016-0049-x), 2016-01-19
Supplement: 13027_2016_49_MOESM1_ESM.pdf [file 13027_2016_49_MOESM1_ESM.pdf]

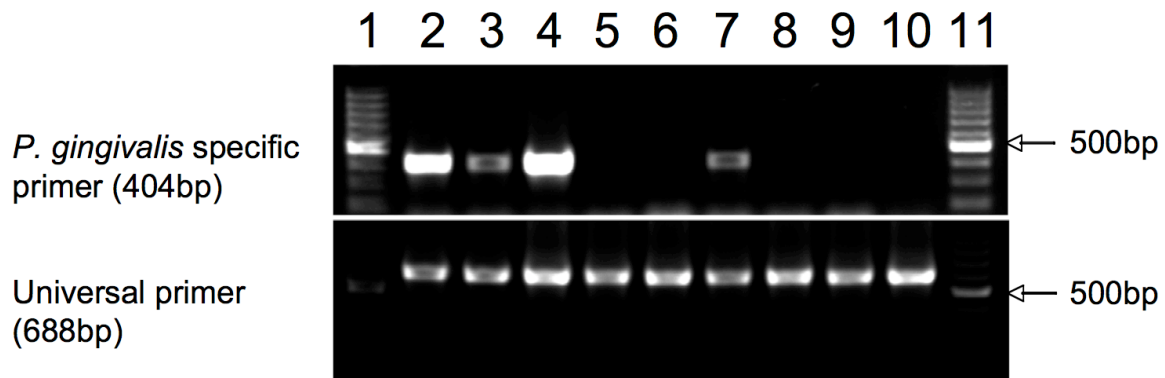

**Figure S1**

*P. gingivalis* 16S DNA in esophageal epithelium. PCR with specific primers for *P. gingivalis* (Upper), and a universal primer (Lower). Representative images of *P. gingivalis* PCR products from several pairs of cancerous (lanes 2, 4, 6, 8) and adjacent fresh biopsy tissues from ESCC patients (lanes 3, 5, 7, 9), and normal biopsy tissues as a control (Lane 10). Lanes 1 and 11 are molecular size markers.
