# Supplementary material for: Presence of Porphyromonas gingivalis in esophagus and its association with the clinicopathological characteristics and survival in patients with esophageal cancer
Source: Springer Nature journal article supplement (doi:10.1186/s13027-016-0049-x), 2016-01-15
Supplement: MOESM2 [file 25661908]

**Supplemental table 1** Concordance between the immunohistochemistry of *P. gingivalis* whole antigens and RT-PCR of *P. gingivalis* 16S rRNA in the cancerous tissue from patients with ESCC

| Approaches     | PCR expression |    | Kappa value | p value |
|----------------|----------------|----|-------------|---------|
|                | +              | -  |             |         |
| <b>IHC (+)</b> | 67             | 1  | 0.882       | <0.0001 |
| <b>IHC (-)</b> | 4              | 28 |             |         |
| Total          | 71             | 29 |             |         |

\* Kappa>0.7 excellent; 0.4-0.7, good; <0.4, poor agreement.
